# Supplementary material
Source: publisher figshare collection journal article supplement (https://gsapubs.figshare.com/ndownloader/files/22757183)
Supplement: Supplementary file 1 [file 22757183]

## METHODS

Dry, homogenized sediment samples were extracted with 90% dichloromethane and 10% methanol using an accelerated solvent extractor. Extracts were transesterified with 5% hydrochloric acid and 95% methanol at 70°C for 12hrs ( $\delta^{13}\text{C}_{\text{methanol}} = -47.25 \pm 0.10$ ,  $n=3$ ). Excess milliQ water was added to the hydrolyzed products and the lipids were partitioned into hexane. The hexane extracts were dried by passing through a column of anhydrous sodium sulfate and separated into 3 fractions by column chromatography (column: 5 cm x 40 mm Pasteur pipette, 5% water-deactivated silica-gel, 100-200 mesh; alkanes eluted with hexane, FAMES eluted with 5% ethyl acetate in hexane). Urea adduction was used to remove branched and cyclic compounds, from straight chain ( $\text{C} \geq 14$ ) molecules. Molecular-level carbon isotopic measurements were obtained using a gas chromatograph - isotope ratio monitoring - mass spectrometer (GC-irm-MS) consisting of a HP6890 GC (equipped with a CP sil 5 CB column (60m  $\times$  0.25mm, film thickness 0.25 $\mu\text{m}$ ); and a Gerstel programmable injector interfaced via a combustion furnace at 850°C to a Finnigan MAT Delta<sup>Plus</sup> MS. Samples were injected in triplicate along with reference standards of known isotopic composition. Individual fatty acid  $\delta^{13}\text{C}$  values were corrected for derivative carbon based on isotopic mass balance.
